# Supplementary material for: MOF surface method for the ultrafast and one-step generation of metal-oxide-NP@MOF composites as lithium storage materials
Source: Royal Society of Chemistry journal article supplement (doi:10.1039/c6ta03687b), 2016-01-01

## Supporting Information

### **MOF surface method for ultrafast and one-step generation of metal-oxide-NP@MOF composite as lithium storage materials**

Chang Sheng Yan,<sup>a</sup> Heng Ya Gao,<sup>a</sup> Le Le Gong,<sup>a</sup> Lu Fang Ma,<sup>\*b</sup> Li Long Dang,<sup>a,b</sup> Le Zhang,<sup>a</sup> Pan Pan Meng,<sup>a</sup> and Feng Luo<sup>a\*</sup>

This file includes:

Figure S1-22

**Fig. S1** Single crystal x-ray structures of UTSA-74. a) The dinuclear unit built on both tetrahedral and octahedral Zn ions and its connectivity connecting to four identical organic ligands. b) The connectivity of the organic ligand that connects to four identical dinuclear units. Consequently, c) and d) the combination of dinuclear unit and organic ligands creates a fgl topology.

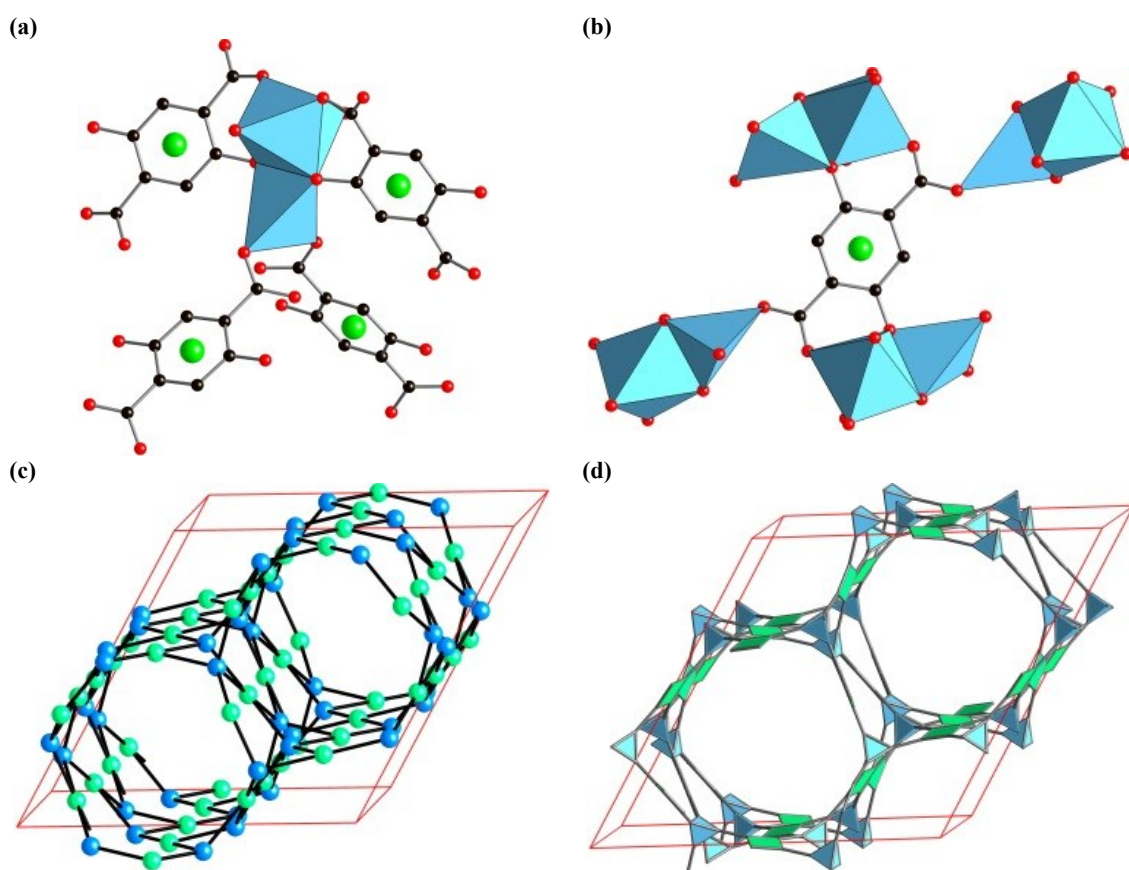

**Fig. S2** Representative SEM, **TEM** and HRTEM images of Fe<sub>2</sub>O<sub>3</sub>@MOF-74. The Fe<sub>2</sub>O<sub>3</sub> gives a leaves-like morphology.

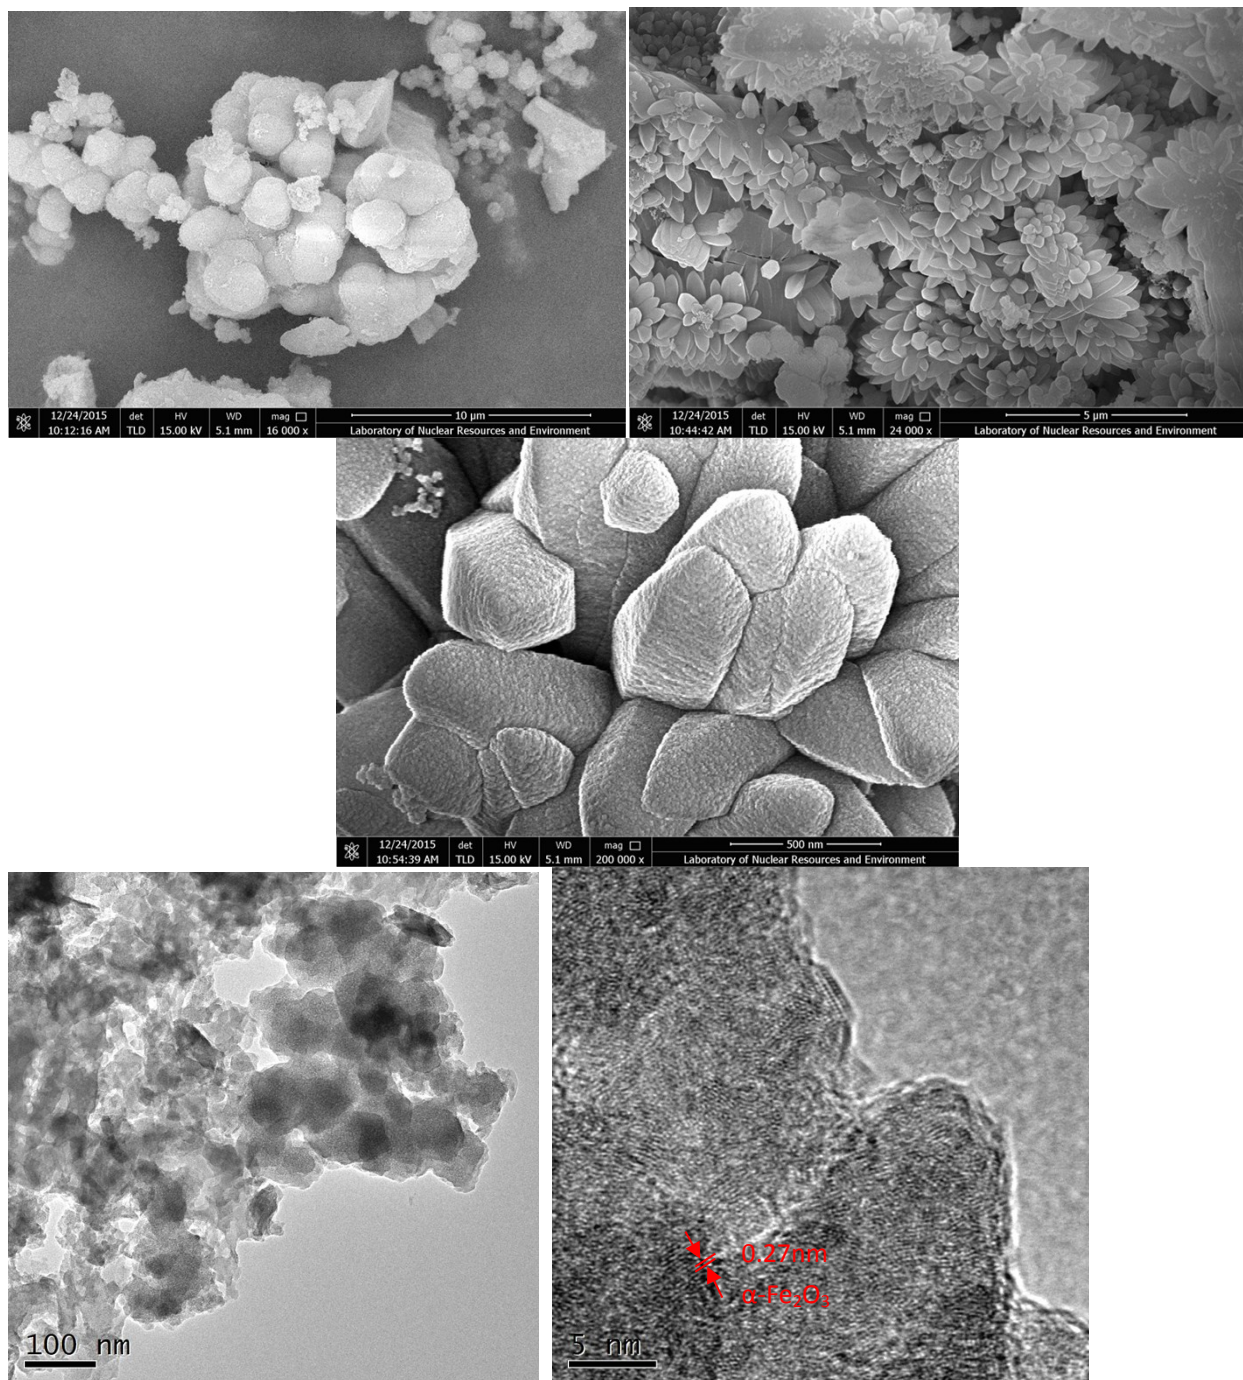



**Fig. S3** Representative SEM, TEM and HRTEM images of  $\text{Fe}_2\text{O}_3@\text{UTSA-74}$ . The  $\text{Fe}_2\text{O}_3$  gives a nanosheet morphology.

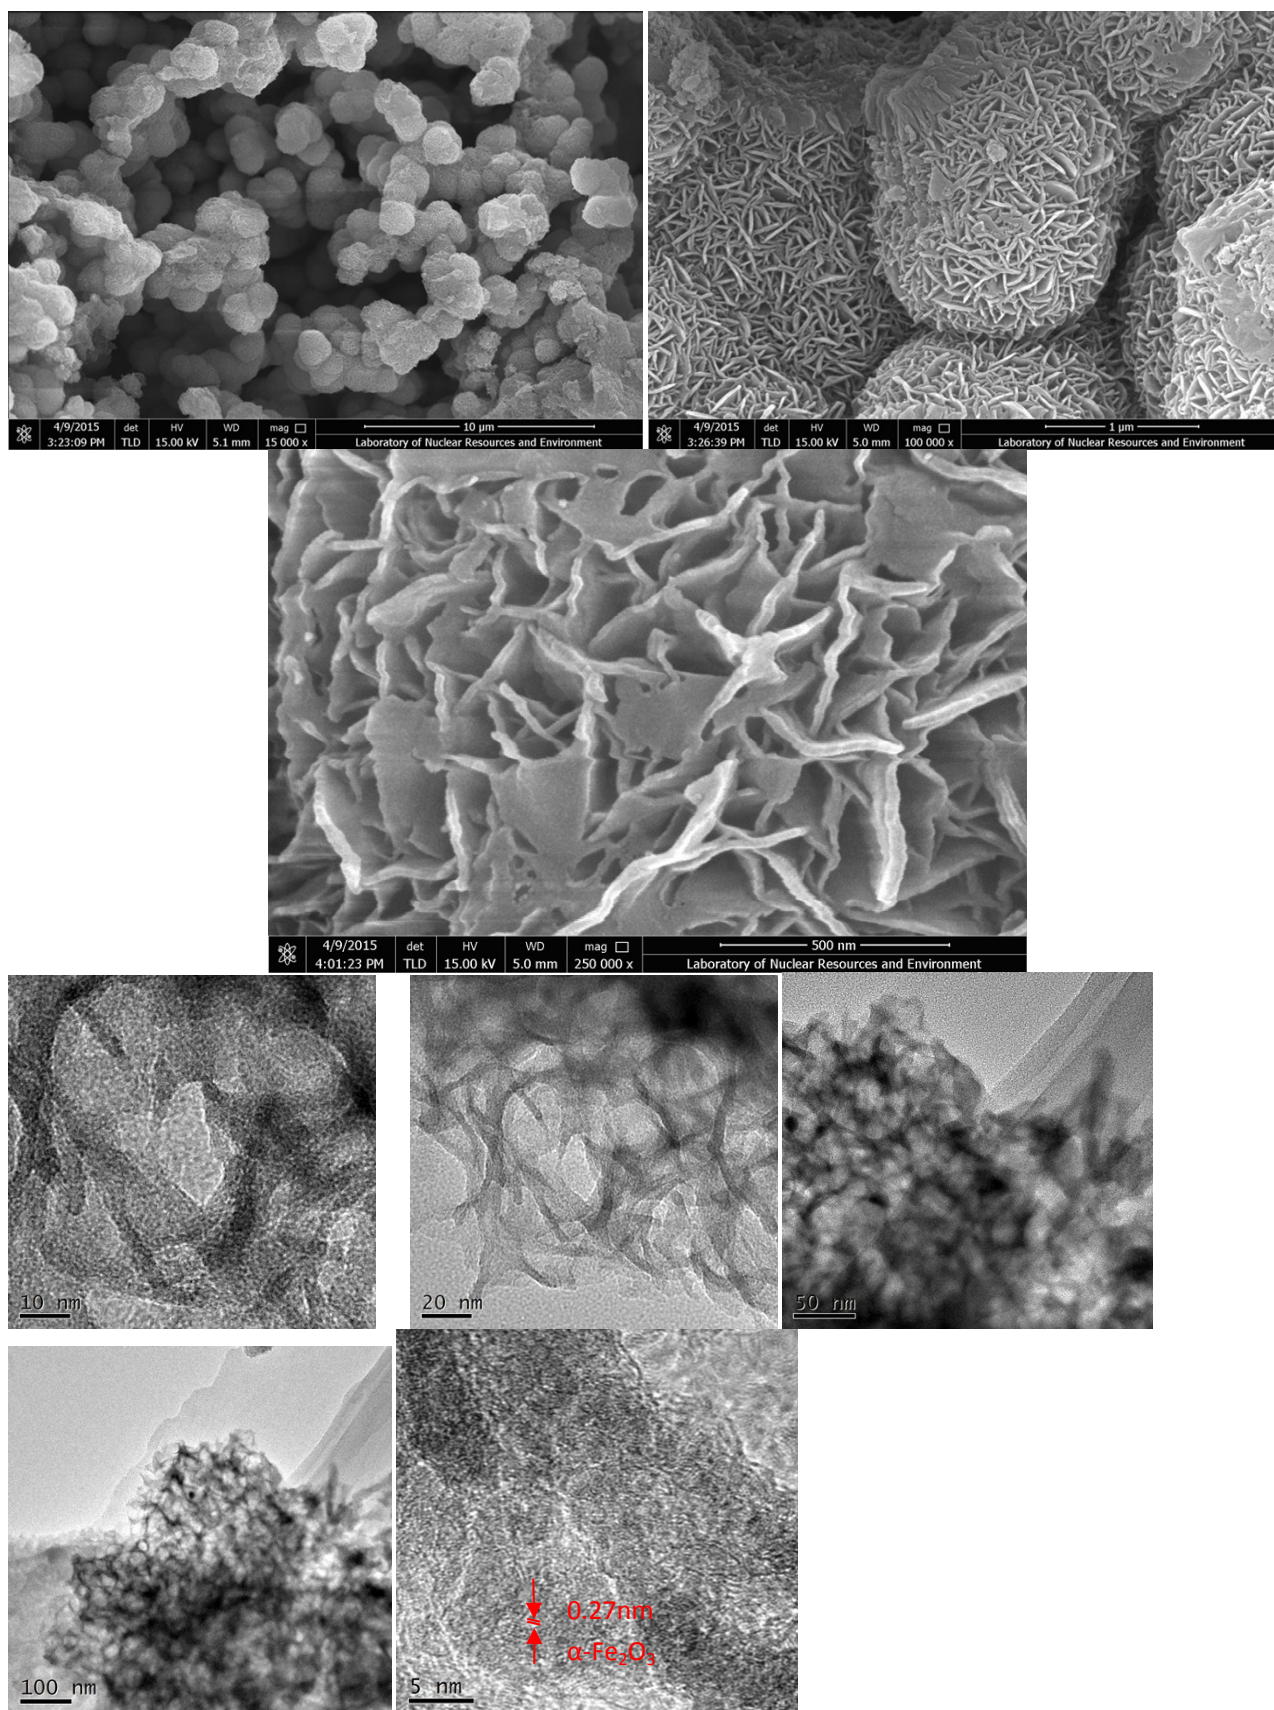

**Fig. S4** Representative TEM, and HRTEM images of  $\text{Fe}_2\text{O}_3@\text{Mg}(\text{DHT})(\text{DMF})_2$ .

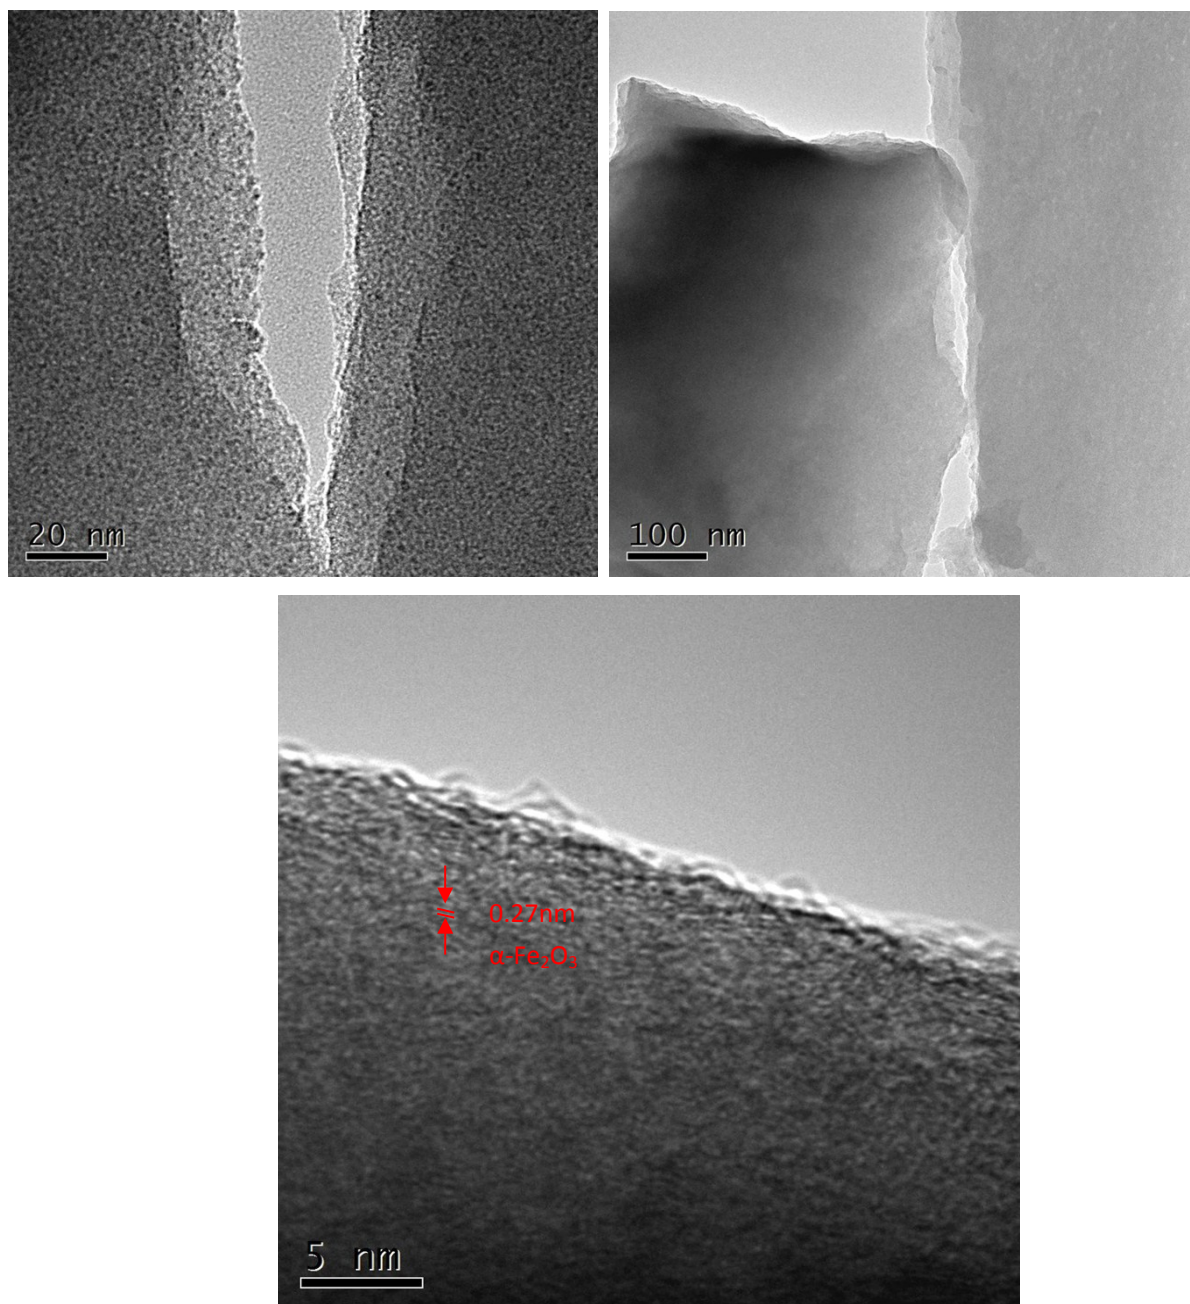



**Fig. S5** Representative SEM images of as-synthesized UiO-66(OH)<sub>2</sub> samples and representative SEM, TEM, and HRTEM images of Fe<sub>2</sub>O<sub>3</sub>@ UiO-66(OH)<sub>2</sub>, respectively. This clearly implies the as-synthesized UiO-66(OH)<sub>2</sub> samples in the form of nanoparticle and undetectable morphology for the Fe<sub>2</sub>O<sub>3</sub> (most likely bulk Fe<sub>2</sub>O<sub>3</sub>).

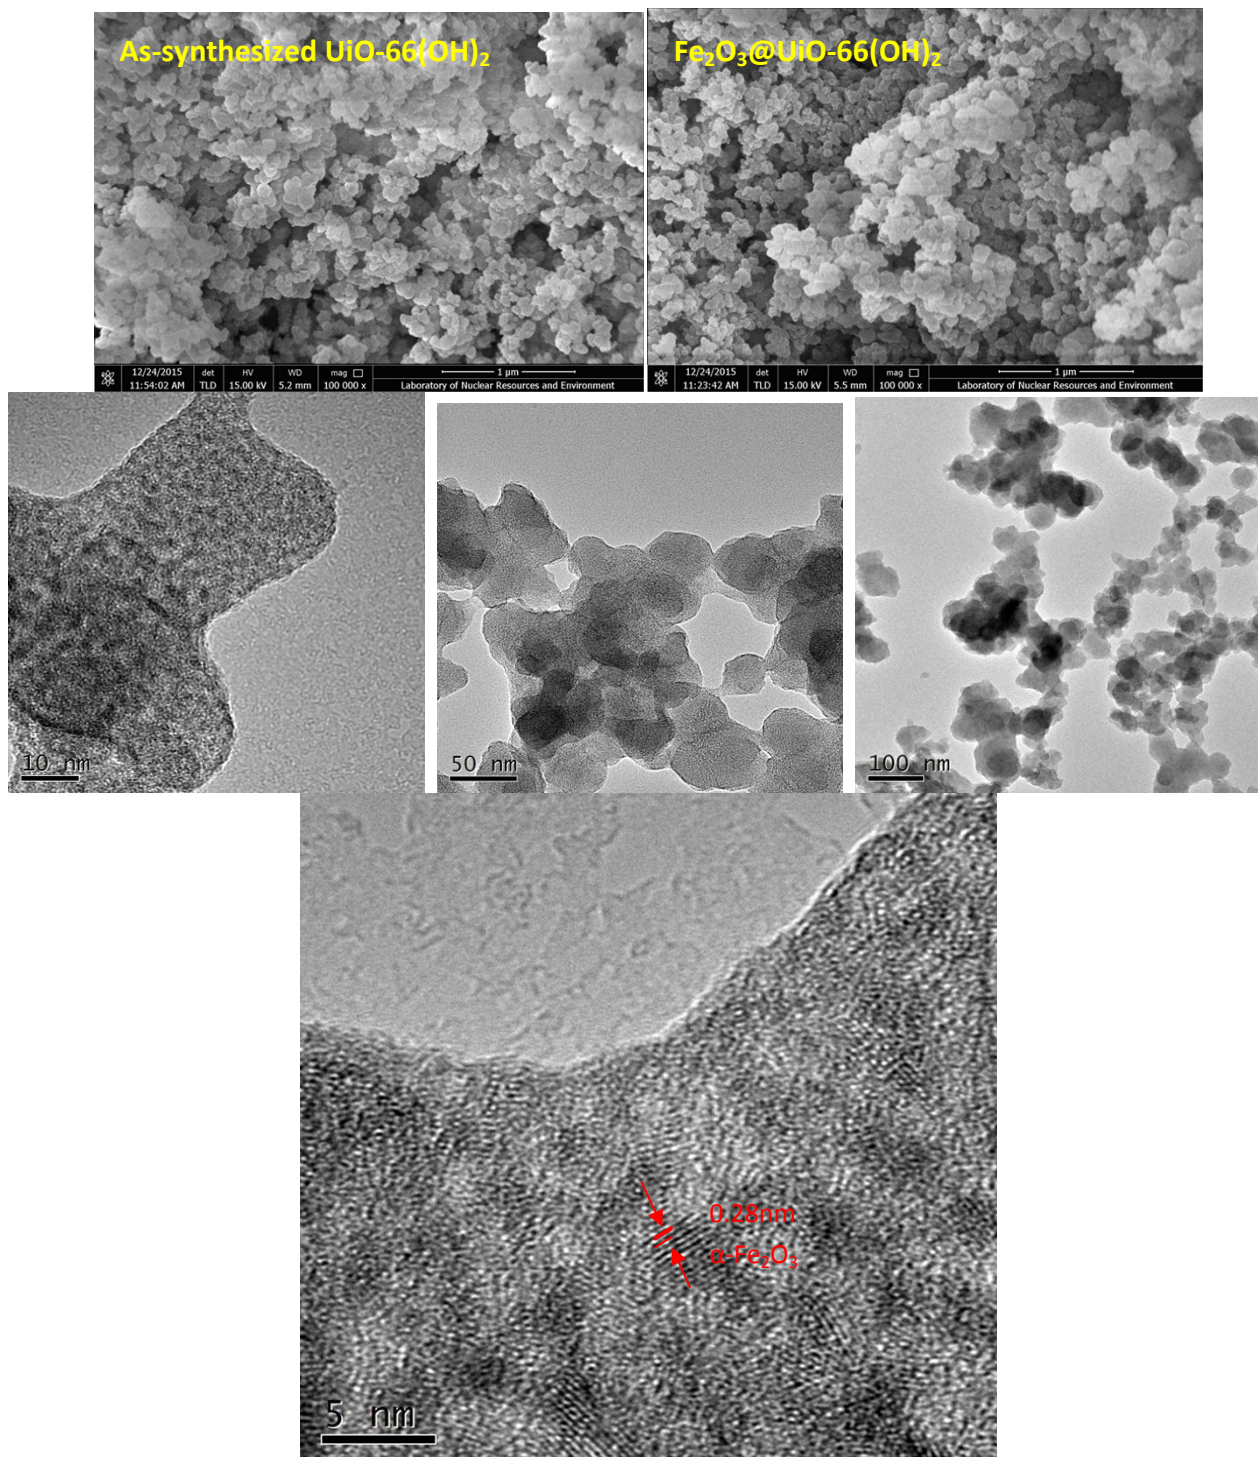

**Fig. S6** Representative SEM images of as-synthesized UiO-66(OH) samples and representative SEM, TEM, and HRTEM images of Fe<sub>2</sub>O<sub>3</sub>@ UiO-66(OH), respectively. This clearly implies the as-synthesized UiO-66(OH)<sub>2</sub> samples in the form of nanoparticle and undetectable morphology for the Fe<sub>2</sub>O<sub>3</sub> (most likely bulk Fe<sub>2</sub>O<sub>3</sub>).

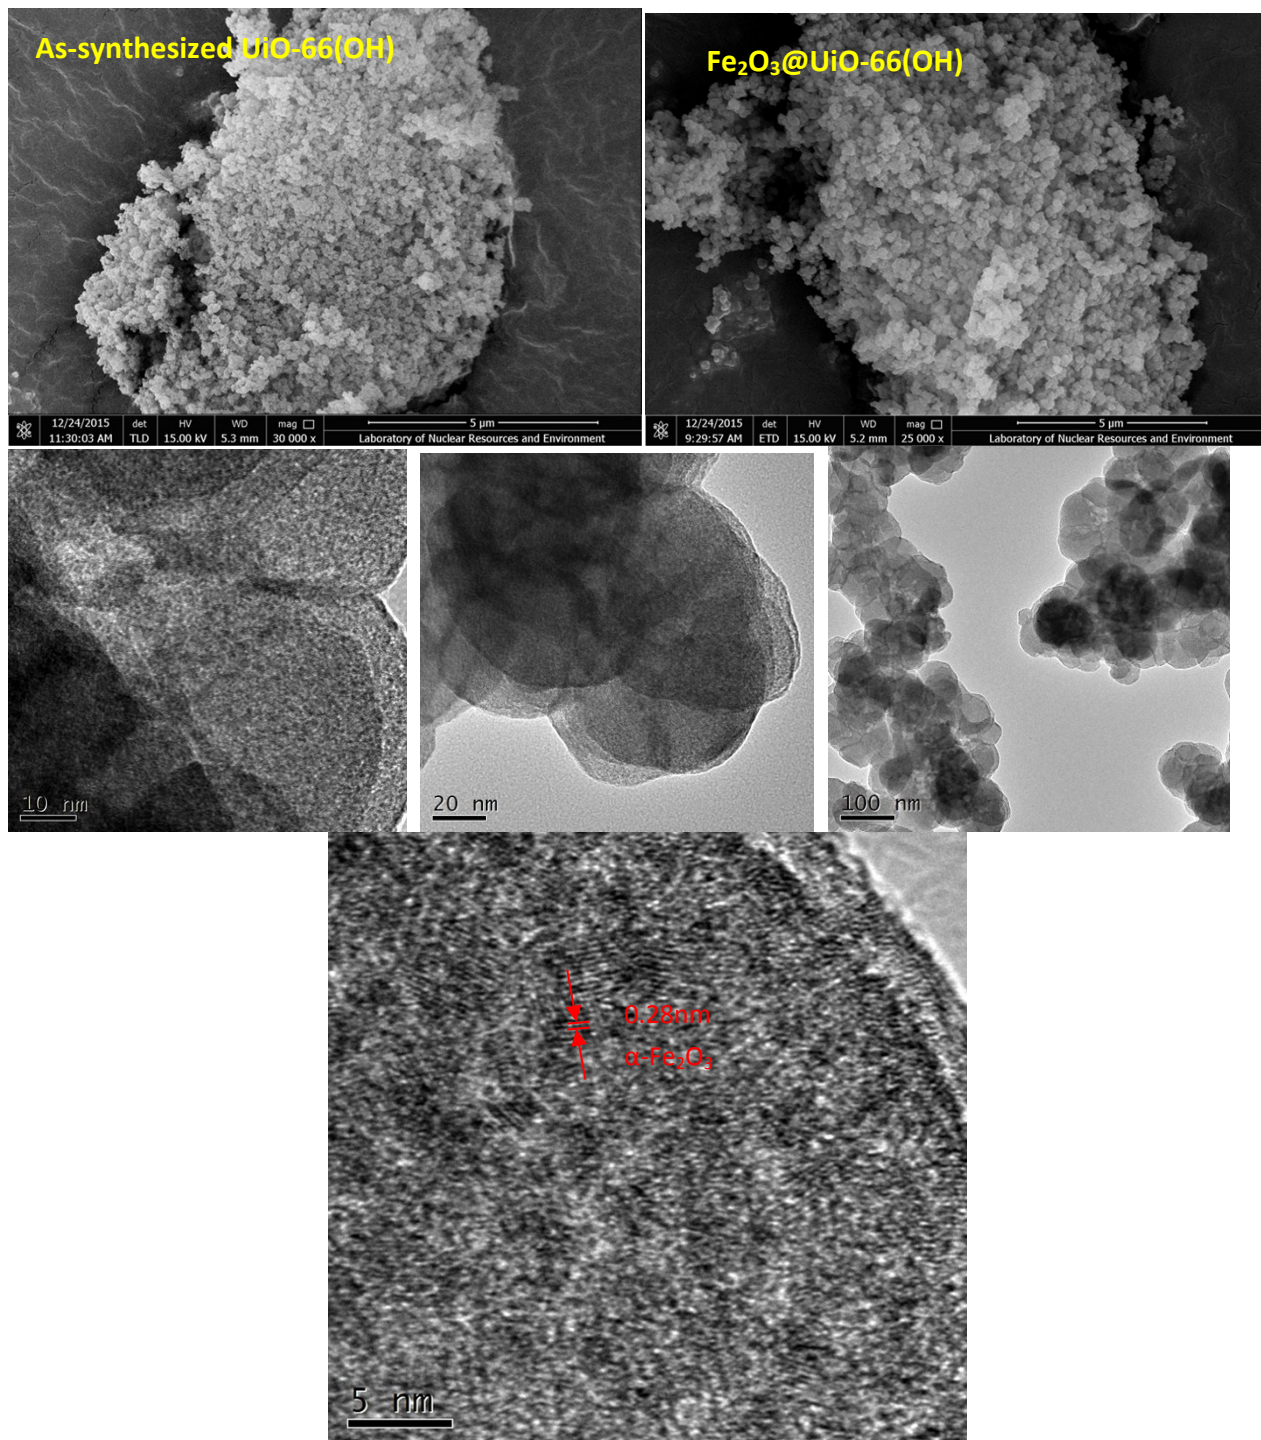



**Fig. S7** IR bonds of as-synthesized MOF-74 samples and  $\text{Fe}_2\text{O}_3@\text{MOF-74}$  composite. The difference between them is highlighted and derived from  $\text{Fe}_2\text{O}_3$ .

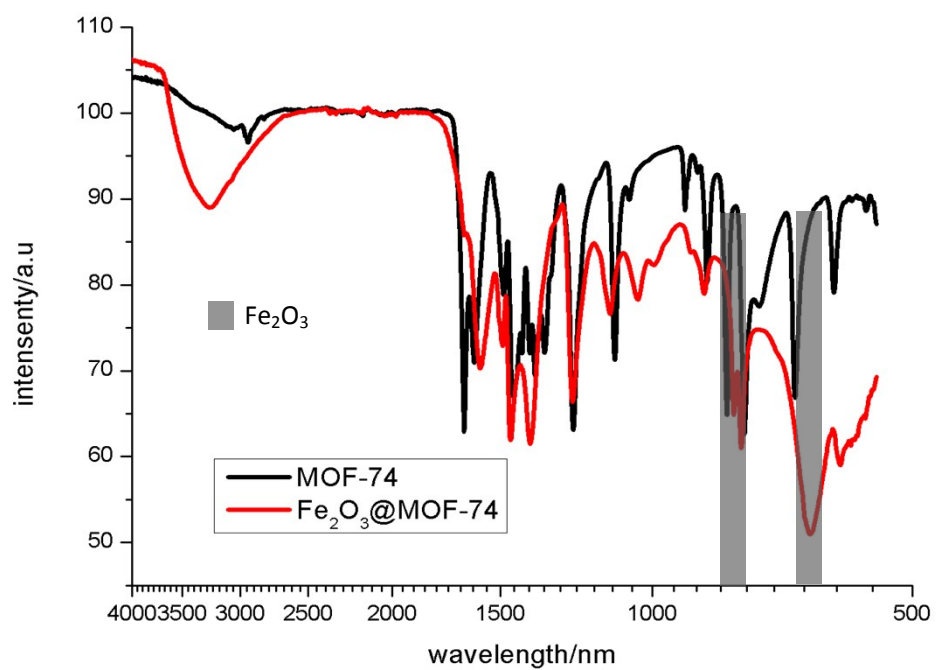



**Fig. S8** IR bonds of as-synthesized UTSA-74 samples and  $\text{Fe}_2\text{O}_3@\text{UTSA-74}$  composite. The difference between them is highlighted and derived from  $\text{Fe}_2\text{O}_3$ .

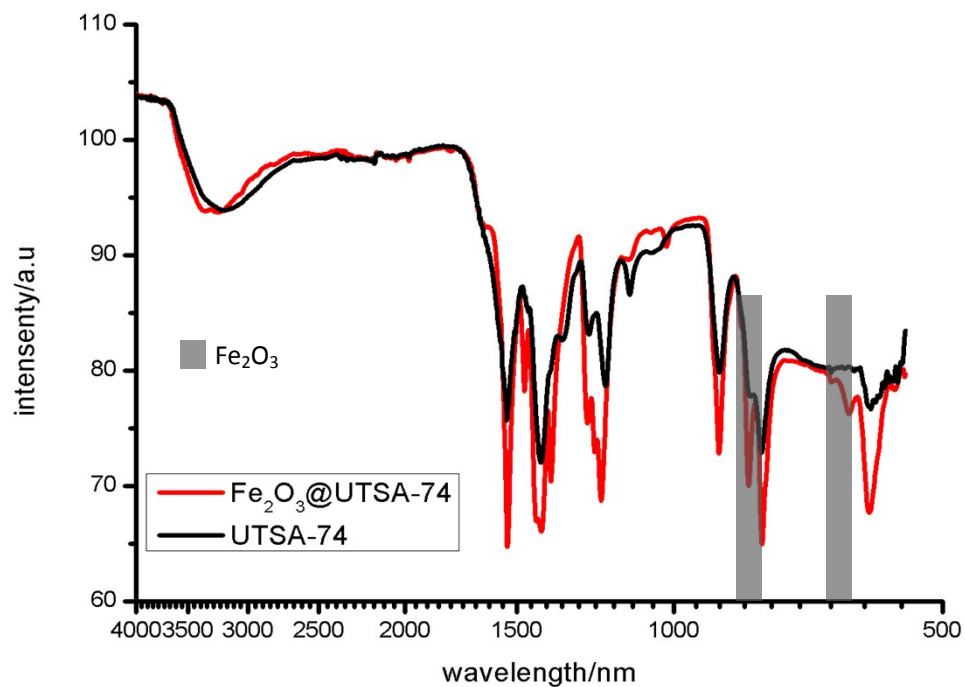

**Fig. S9** IR bonds of as-synthesized  $\text{Mg}(\text{DHT})(\text{DMF})_2$  samples and  $\text{Fe}_2\text{O}_3@\text{Mg}(\text{DHT})(\text{DMF})_2$  composite. The difference between them is highlighted and derived from  $\text{Fe}_2\text{O}_3$ .

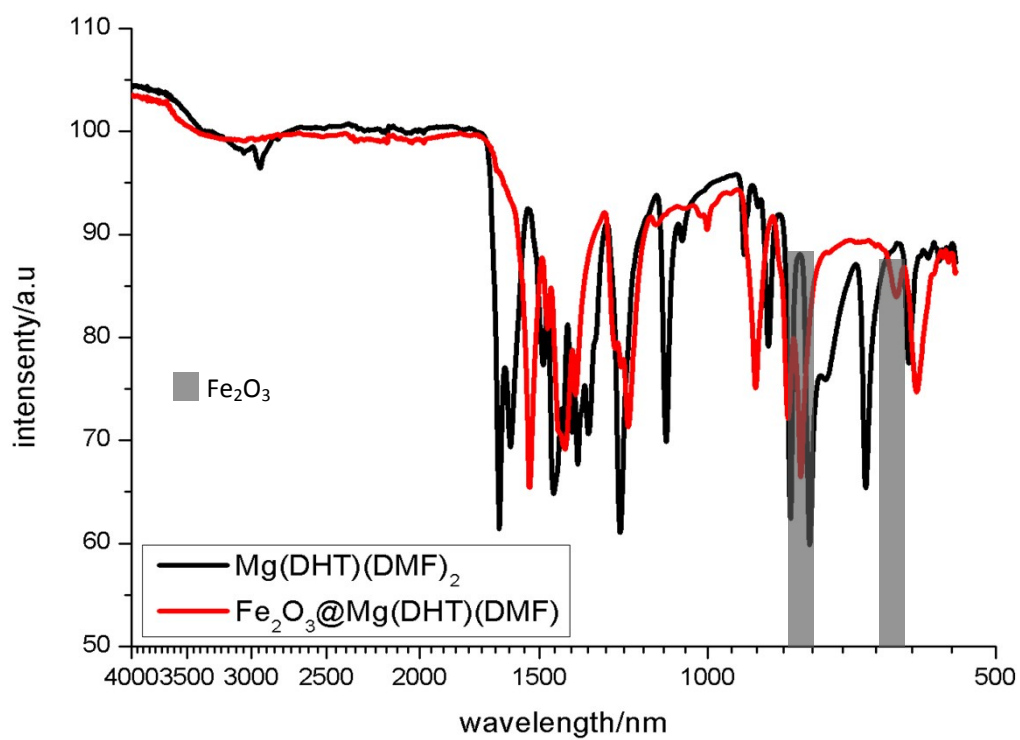

**Fig. S10** IR bonds of as-synthesized UiO-66(OH)<sub>2</sub> samples and Fe<sub>2</sub>O<sub>3</sub>@UiO-66(OH)<sub>2</sub> composite. The difference between them is highlighted and derived from Fe<sub>2</sub>O<sub>3</sub>.

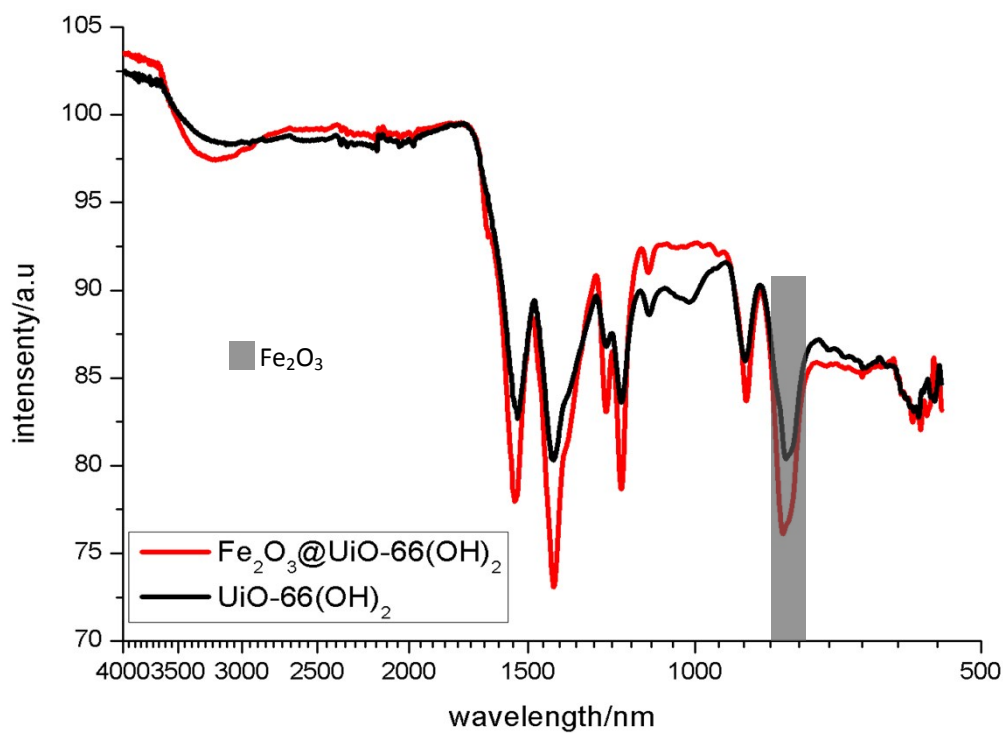



**Fig. S11** IR bonds of as-synthesized UiO-66(OH) samples and Fe<sub>2</sub>O<sub>3</sub>@UiO-66(OH) composite. The difference between them is highlighted and derived from Fe<sub>2</sub>O<sub>3</sub>.

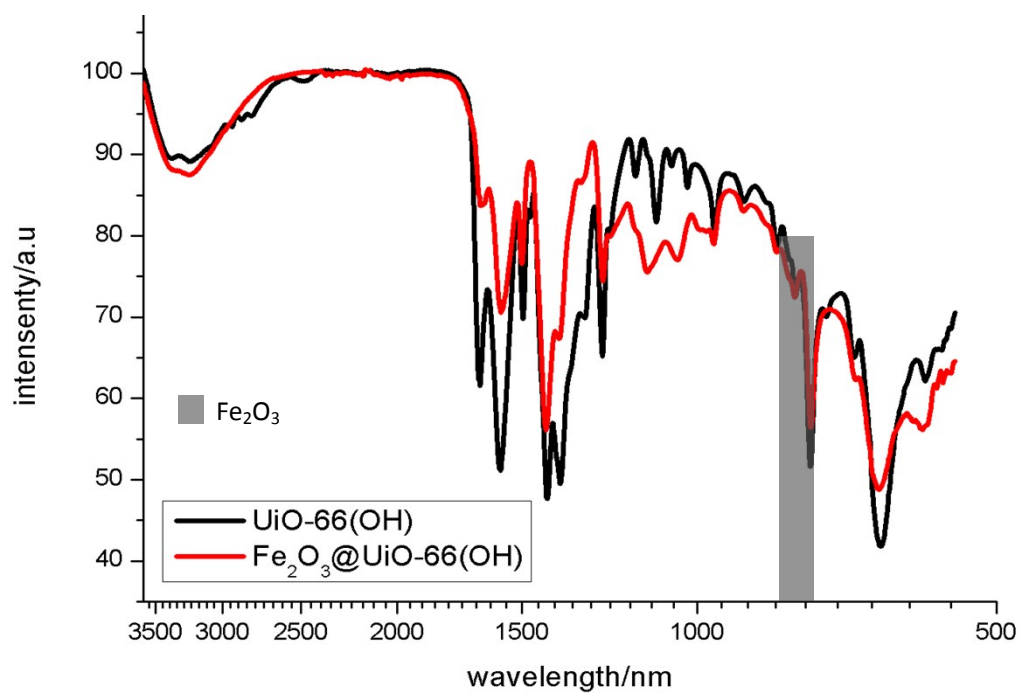

**Fig. S12** XPS spectroscopy of  $\text{Fe}_2\text{O}_3@\text{UTSA-74}$ :  $\text{F}_{2p}$  (711, 719, 725, 734 eV) for  $\text{Fe}_2\text{O}_3$  and  $\text{O}_{1s}$  (529.5, 531.6, 533.2 eV ) for both  $\text{Fe}_2\text{O}_3$  and UTSA-74.

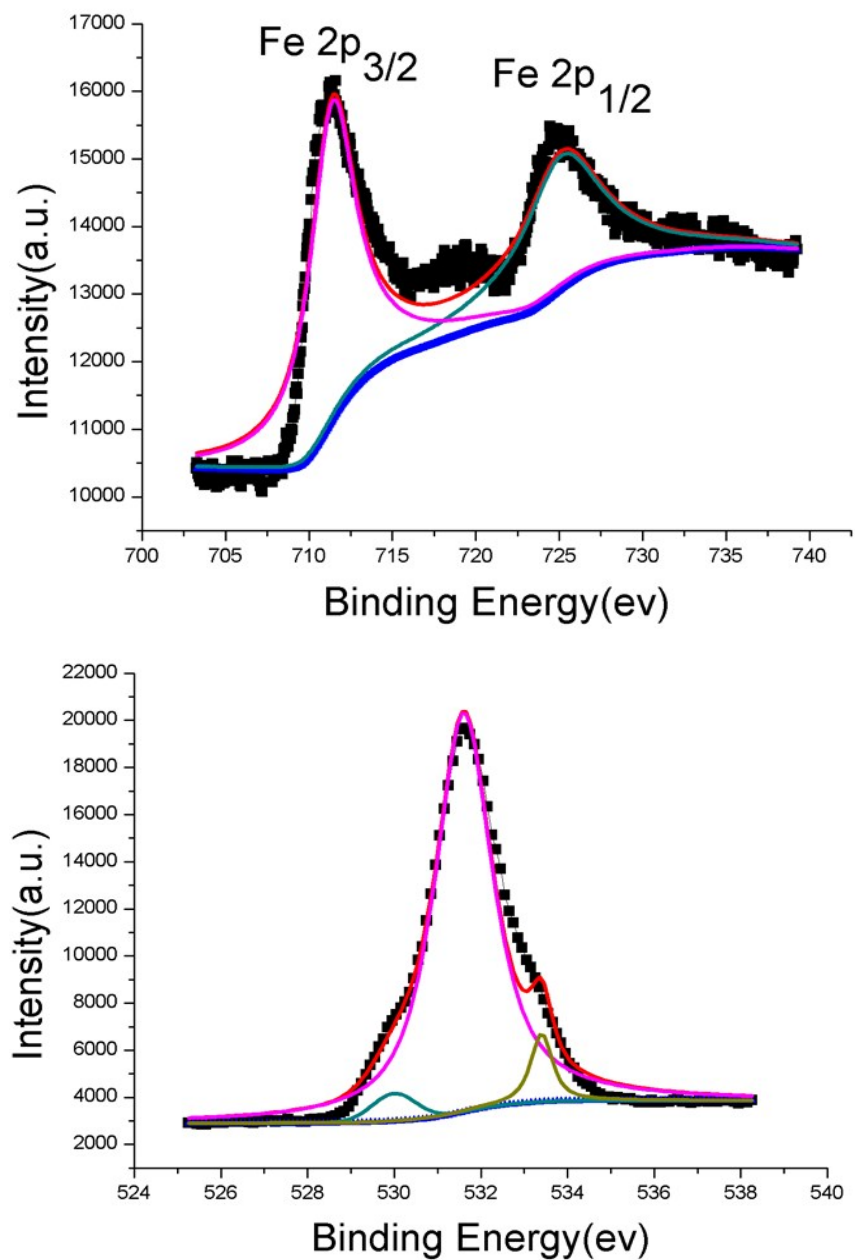

**Fig. S13** XPS spectroscopy of  $\text{Fe}_2\text{O}_3@\text{Mg}(\text{DHT})(\text{DMF})_2$ :  $\text{F}_{2p}$  (712, 719, 726, 735 eV) for  $\text{Fe}_2\text{O}_3$  and  $\text{O}_{1s}$  (530, 532, 533.5 eV) for both  $\text{Fe}_2\text{O}_3$  and  $\text{Mg}(\text{DHT})(\text{DMF})_2$

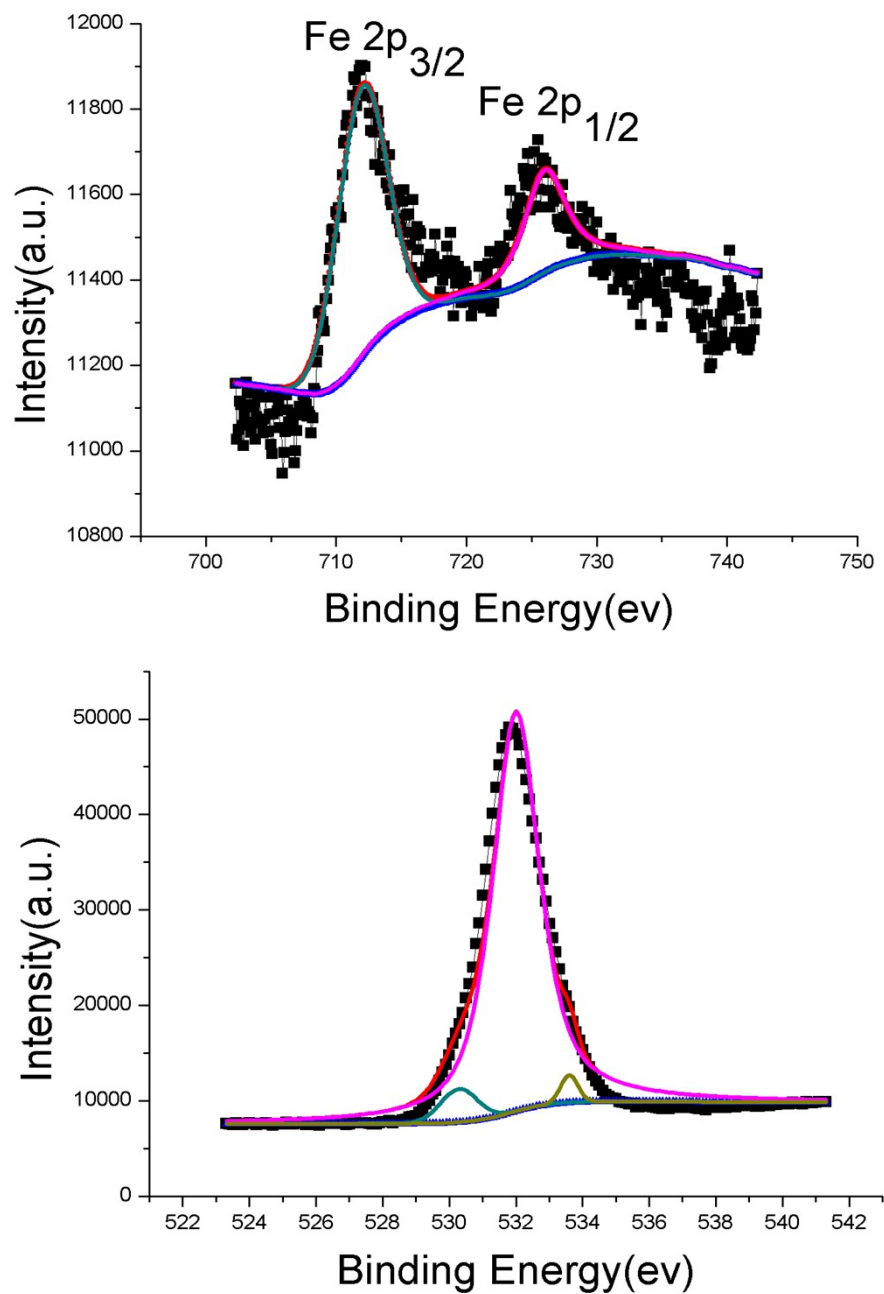



**Fig. S14** XPS spectroscopy of  $\text{Fe}_2\text{O}_3@\text{UiO-66}(\text{OH})_2$ :  $\text{F}_{2p}$  (711.7, 719, 725.8, 736 eV) for  $\text{Fe}_2\text{O}_3$  and  $\text{O}_{1s}$  (530.2, 532, 533.5 eV) for both  $\text{Fe}_2\text{O}_3$  and  $\text{UiO-66}(\text{OH})_2$ .

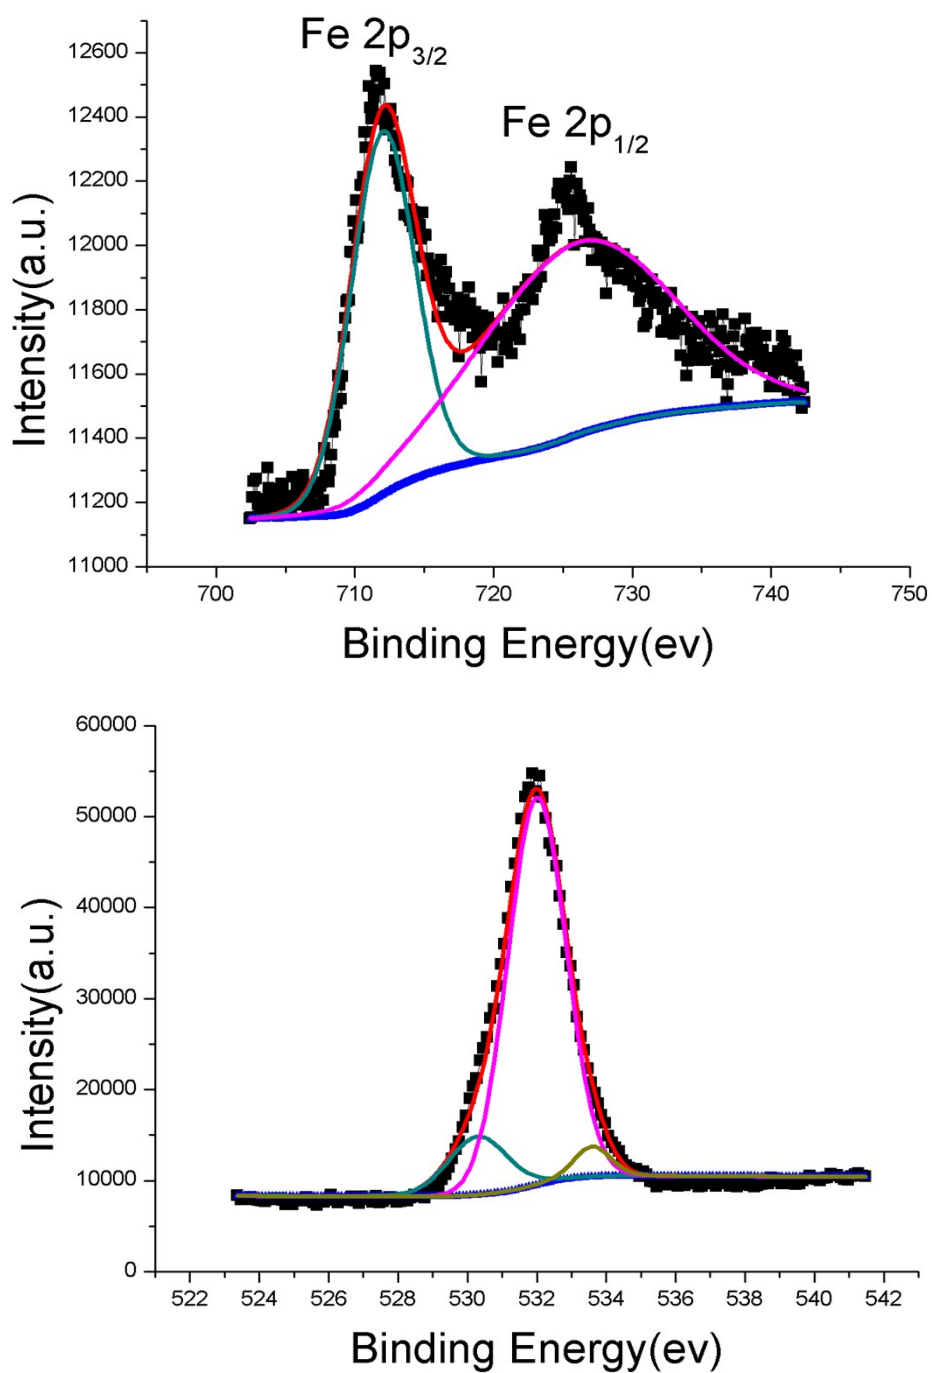

**Fig. S15** XPS spectroscopy of  $\text{Fe}_2\text{O}_3@\text{UiO-66(OH)}$ :  $\text{F}_{2p}$  (712, 718.5, 725.4, 735.4 eV) for  $\text{Fe}_2\text{O}_3$  and  $\text{O}_{1s}$  (531.8, 533.5 eV) for both  $\text{Fe}_2\text{O}_3$  and  $\text{UiO-66(OH)}$ .

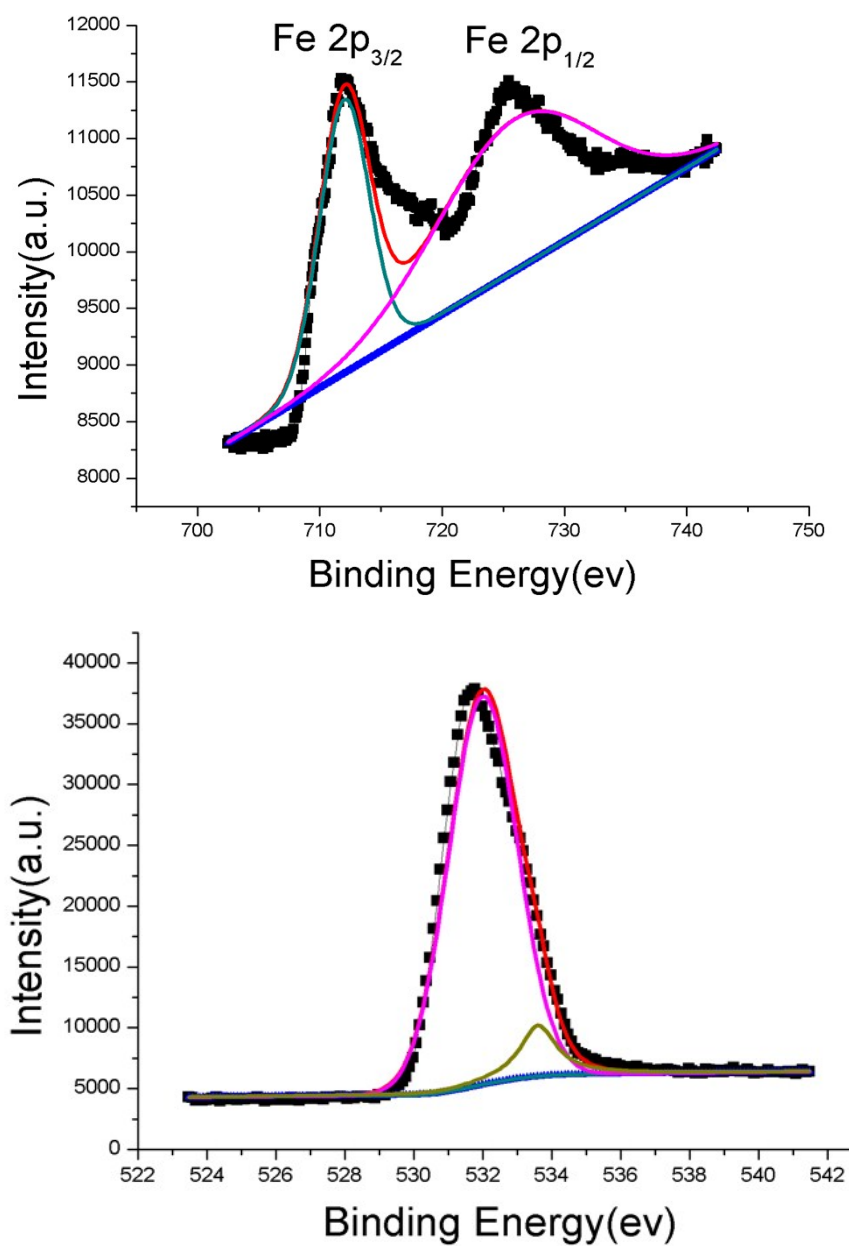

**Fig. S16** Nitrogen physisorption isotherm of as-synthesized MOF-74 and Fe<sub>2</sub>O<sub>3</sub>@MOF-74 samples. The sample was pretreated at 80 °C under vacuum for 12 h. The BET surface area and Langmuir surface area for MOF-74 and Fe<sub>2</sub>O<sub>3</sub>@MOF-74 is 604/705.8 m<sup>2</sup>/g and 13.2/15.6 m<sup>2</sup>/g, respectively. MOF-74 gives aperture around 1.0 nm, comparable with the value in literature, whereas Fe<sub>2</sub>O<sub>3</sub>@MOF-74 creates mesoporous form with aperture around 11.3 nm.

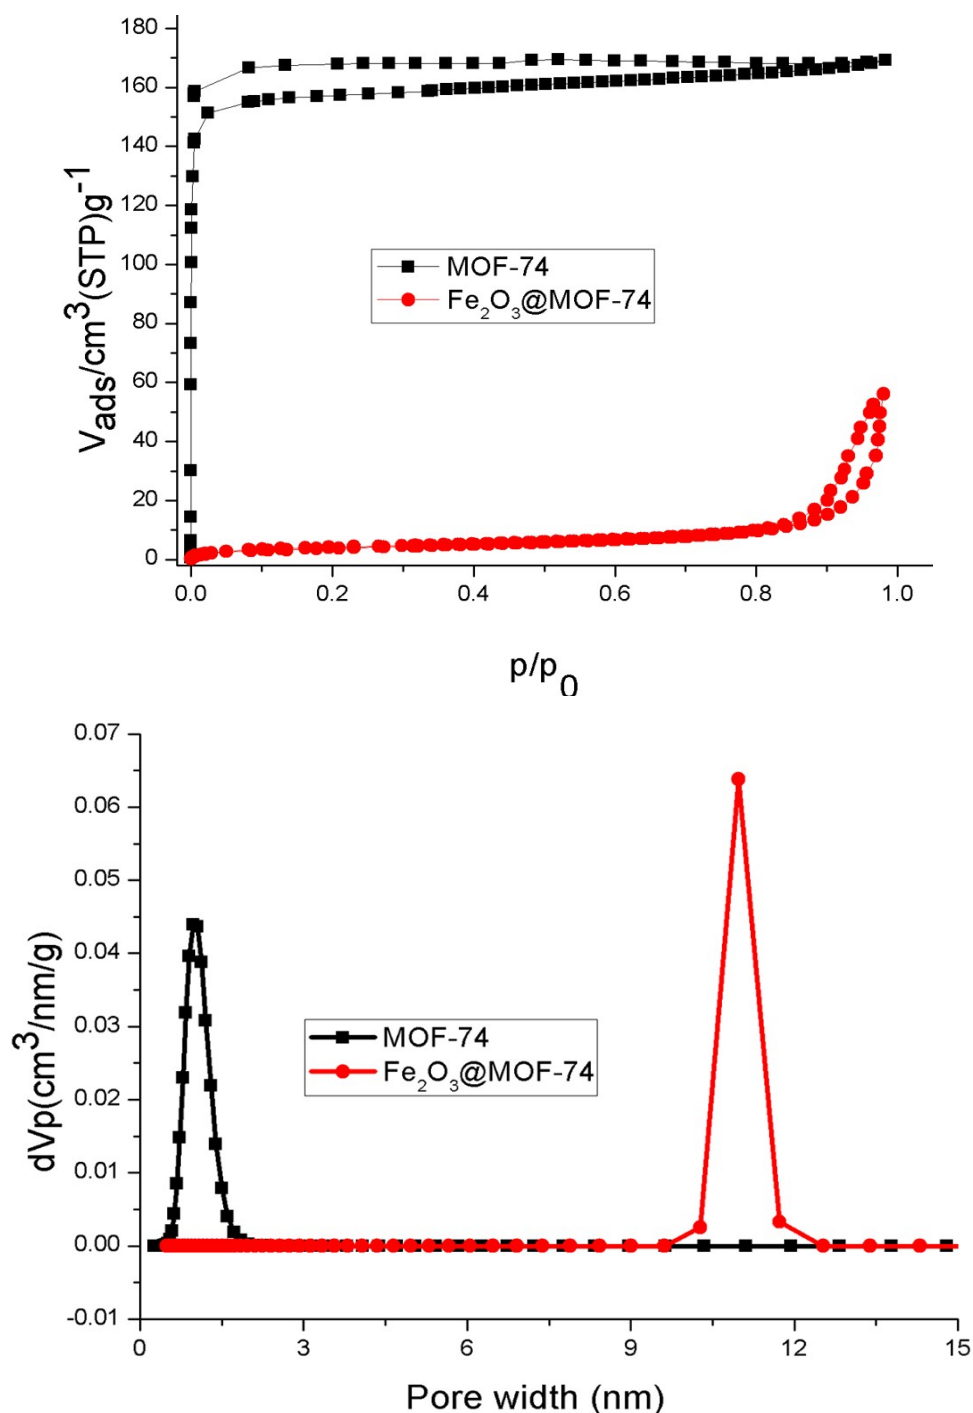



**Fig. S17** Nitrogen physisorption isotherm of as-synthesized UTSA-74 and  $\text{Fe}_2\text{O}_3@\text{UTSA-74}$  samples. The sample was pretreated at  $80^\circ\text{C}$  under vacuum for 12 h. The BET surface area and Langmuir surface area for UTSA-74 and  $\text{Fe}_2\text{O}_3@\text{UTSA-74}$  is  $830/996\text{ m}^2/\text{g}$  and  $528.4/681.1\text{ m}^2/\text{g}$ , respectively. UTSA-74 gives aperture around  $0.8\text{ nm}$ , whereas  $\text{Fe}_2\text{O}_3@\text{UTSA-74}$  creates a microporous-mesoporous form with microporous aperture around  $0.7\text{ nm}$  and mesoporous aperture around  $5.3\text{ nm}$ .

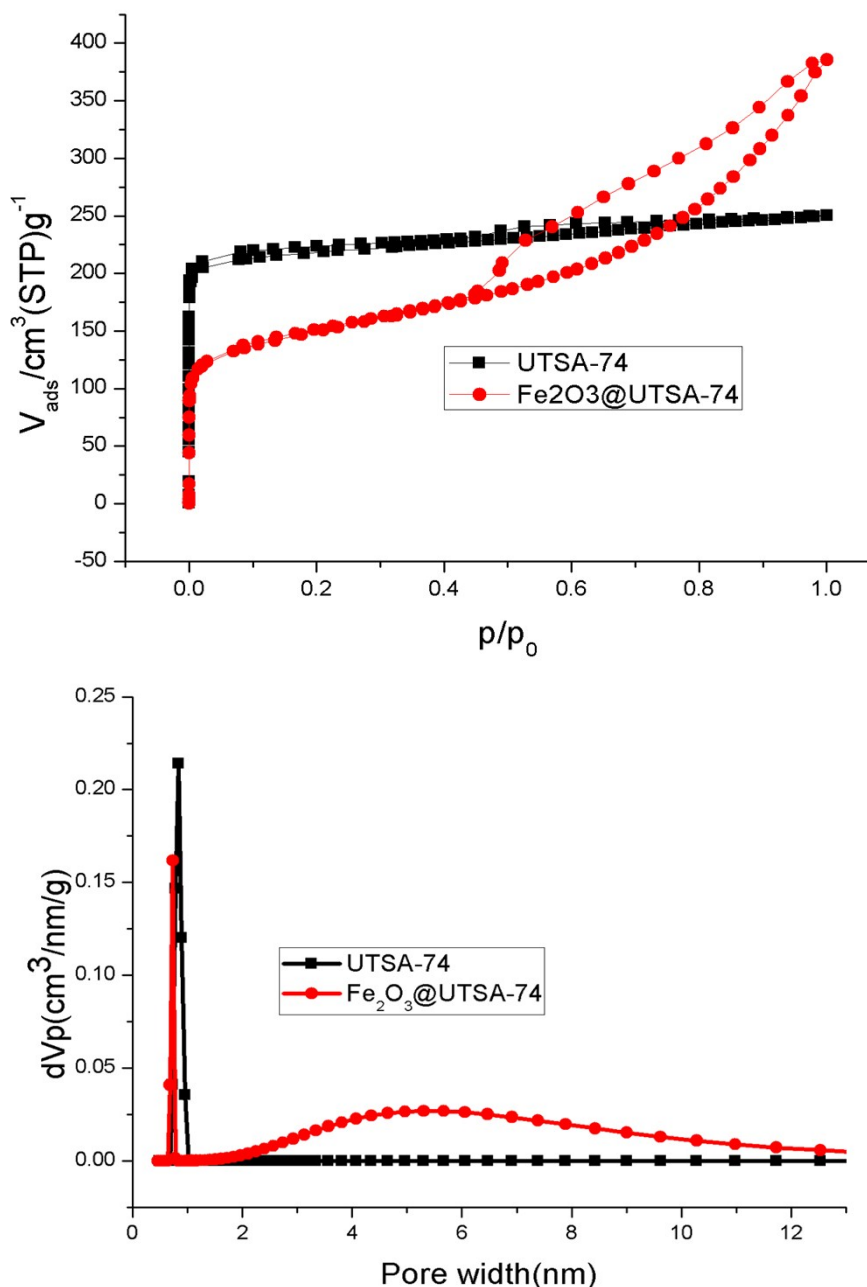

**Fig. S18** Nitrogen physisorption isotherm of  $\text{Fe}_2\text{O}_3@\text{Mg}(\text{DHT})(\text{DMF})_2$  samples. The sample was pretreated at  $80^\circ\text{C}$  under vacuum for 12 h. The BET surface area and Langmuir surface area for  $\text{Fe}_2\text{O}_3@\text{Mg}(\text{DHT})(\text{DMF})_2$  is  $32.2/41.2 \text{ m}^2/\text{g}$ , giving mesoporous form with aperture around 8.6 nm. By contrast, the as-synthesized  $\text{Mg}(\text{DHT})(\text{DMF})_2$  samples is nonporous, thus, the mesoporous form is contributed by  $\text{Fe}_2\text{O}_3$ .

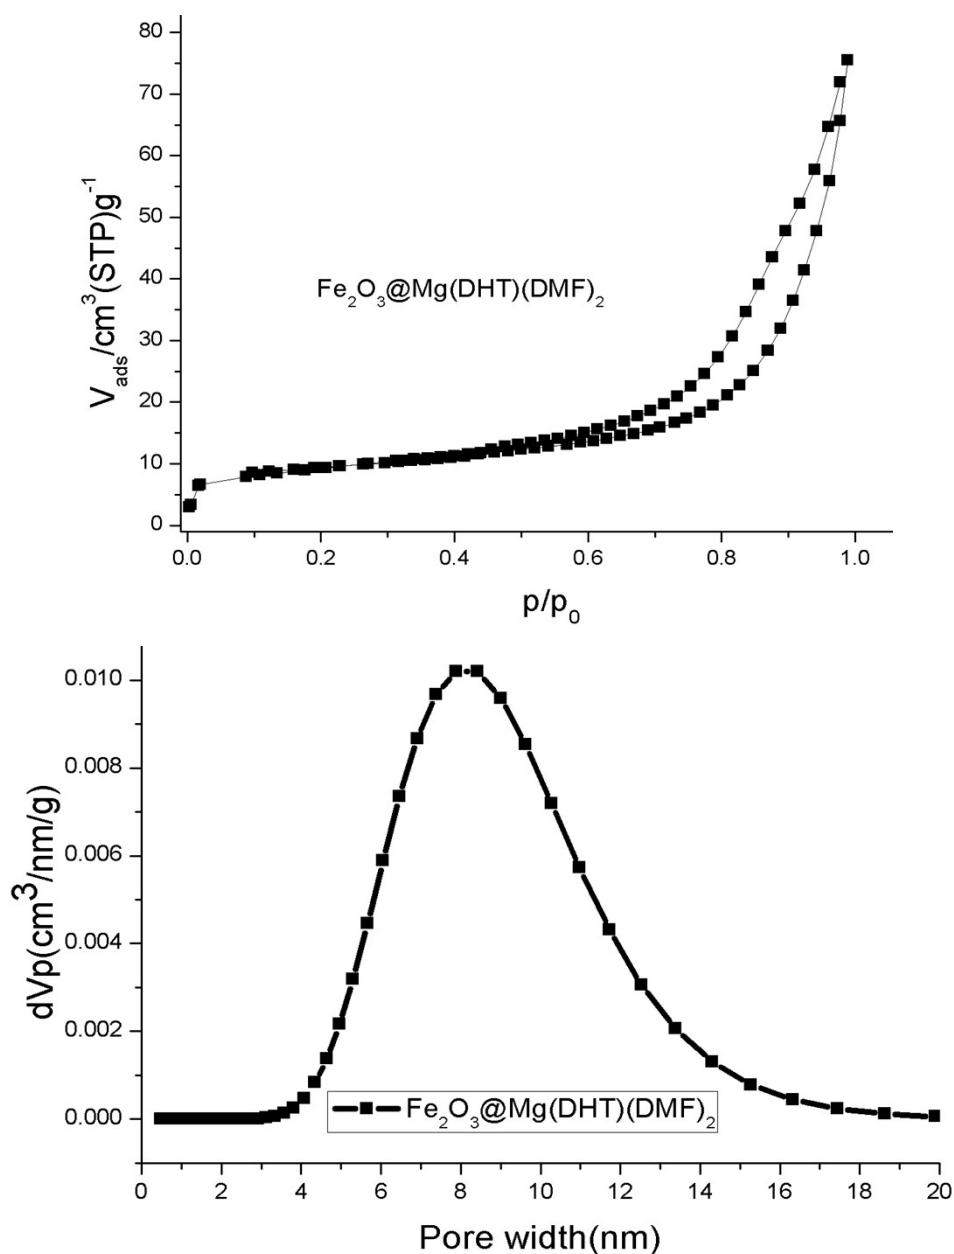

**Fig. S19** Nitrogen physisorption isotherm of as-synthesized UiO-66(OH)<sub>2</sub> and Fe<sub>2</sub>O<sub>3</sub>@ UiO-66(OH)<sub>2</sub> samples. The sample was pretreated at 80°C under vacuum for 12 h. The BET surface area and Langmuir surface area for UiO-66(OH)<sub>2</sub> and Fe<sub>2</sub>O<sub>3</sub>@UiO-66(OH)<sub>2</sub> is 561.4/672.5 m<sup>2</sup>/g and 195.1/264.7 m<sup>2</sup>/g, respectively. UiO-66(OH)<sub>2</sub> gives aperture around 0.85 nm, whereas Fe<sub>2</sub>O<sub>3</sub>@ UiO-66(OH)<sub>2</sub> gives aperture around 0.68 nm.

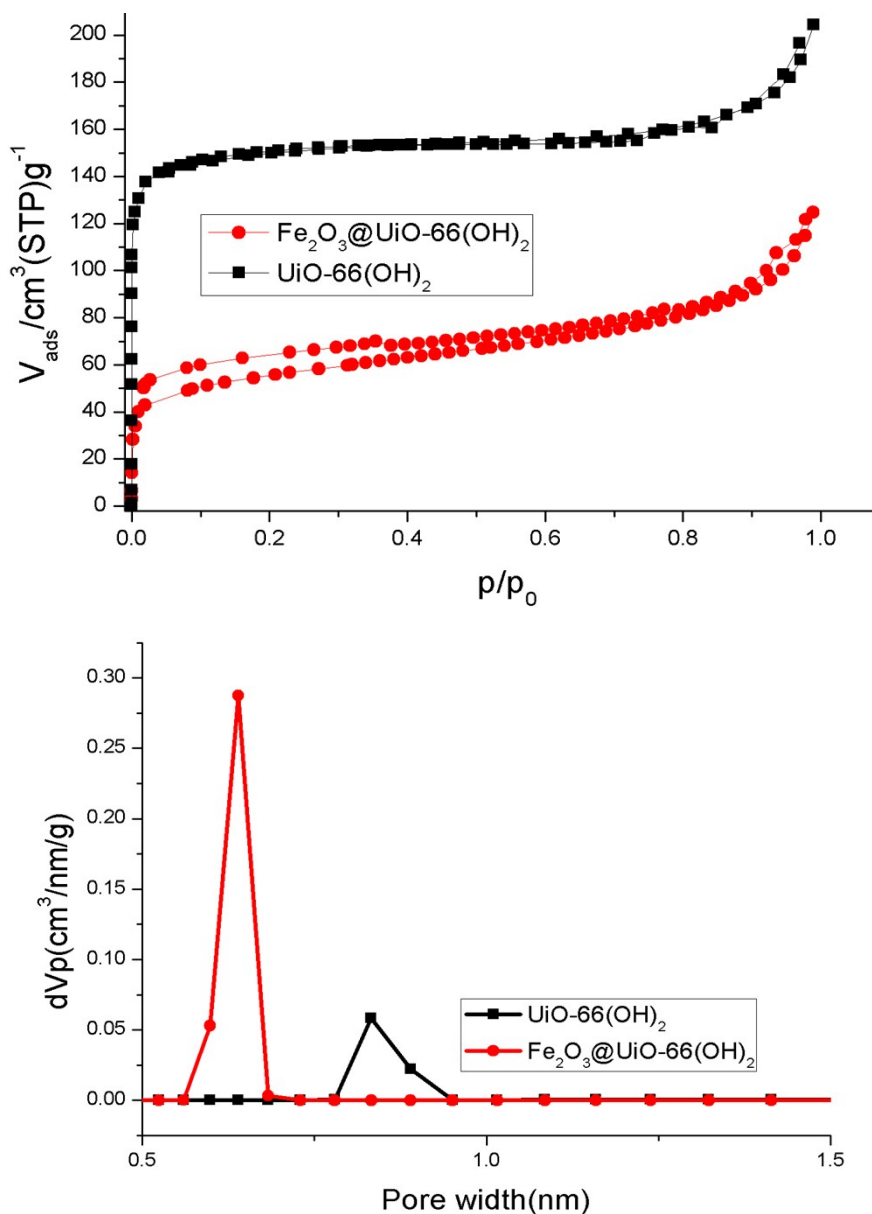

**Fig. S20** Nitrogen physisorption isotherm of as-synthesized UiO-66(OH) and Fe<sub>2</sub>O<sub>3</sub>@ UiO-66(OH) samples. The sample was pretreated at 80°C under vacuum for 12 h. The BET surface area and Langmuir surface area for UiO-66(OH) and Fe<sub>2</sub>O<sub>3</sub>@UiO-66(OH) is 824/1025 m<sup>2</sup>/g and 505.6/613.7 m<sup>2</sup>/g, respectively. UiO-66(OH) gives aperture around 0.81 nm, whereas Fe<sub>2</sub>O<sub>3</sub>@ UiO-66(OH) gives aperture around 0.75 nm.

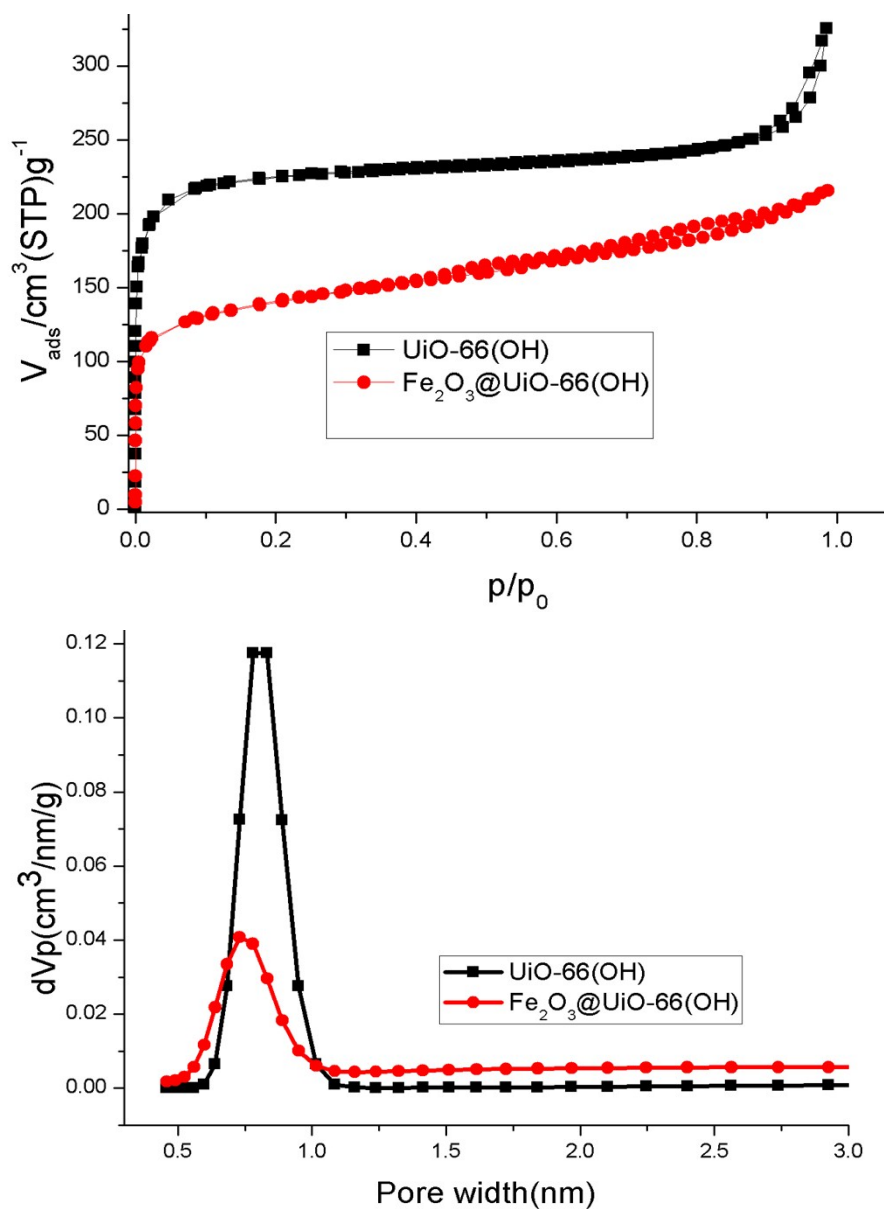

**Fig. S21** The magnetic hysteresis of  $\text{Fe}_2\text{O}_3@\text{MOF-74}$  at 300K, where very small magnetic hysteresis is observed, indicative of very weak ferromagnetic properties of  $\text{Fe}_2\text{O}_3@\text{MOF-74}$  at 300K. This is well consistent with the experiment result that the  $\text{Fe}_2\text{O}_3@\text{MOF-74}$  samples can be enriched by magnet.

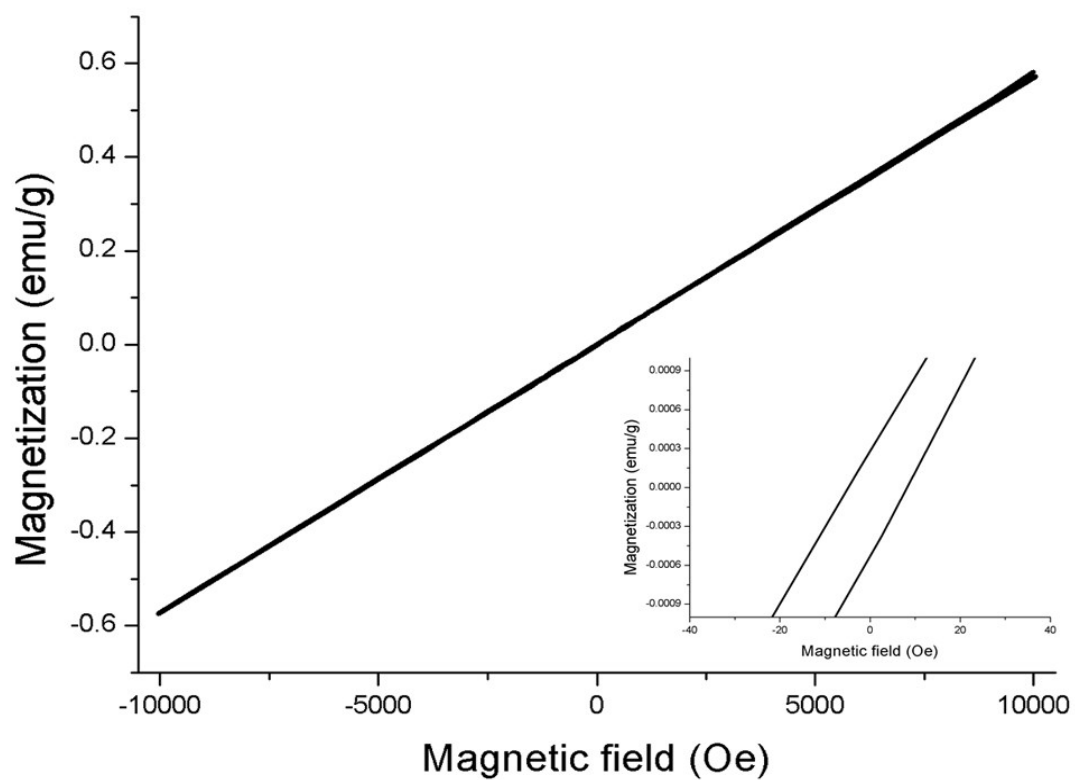



**Fig. S22** The magnetic hysteresis of  $\text{Fe}_2\text{O}_3@\text{UTSA-74}$  at 300K, where small magnetic hysteresis is observed, indicative of weak ferromagnetic properties of  $\text{Fe}_2\text{O}_3@\text{UTSA-74}$  at 300K. This is well consistent with the experiment result that the  $\text{Fe}_2\text{O}_3@\text{UTSA-74}$  samples can be enriched by magnet.

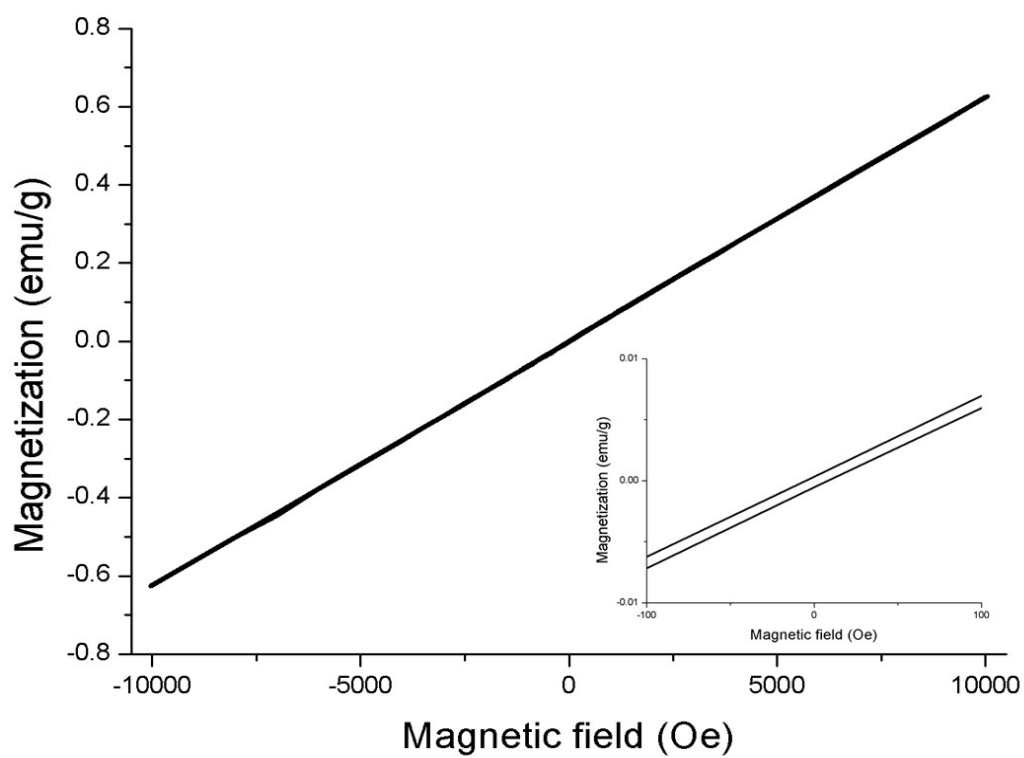

Supplement: c6ta03687b1.pdf [file c6ta03687b1.pdf]
